# Supplementary material for: Three New Species of Hypoxylon (Xylariales, Ascomycota) on a Multigene Phylogeny from Medog in Southwest China
Source: MDPI journal article supplement (doi:10.3390/jof8050500), 2022-05-11
Supplement: s1 [file s1]

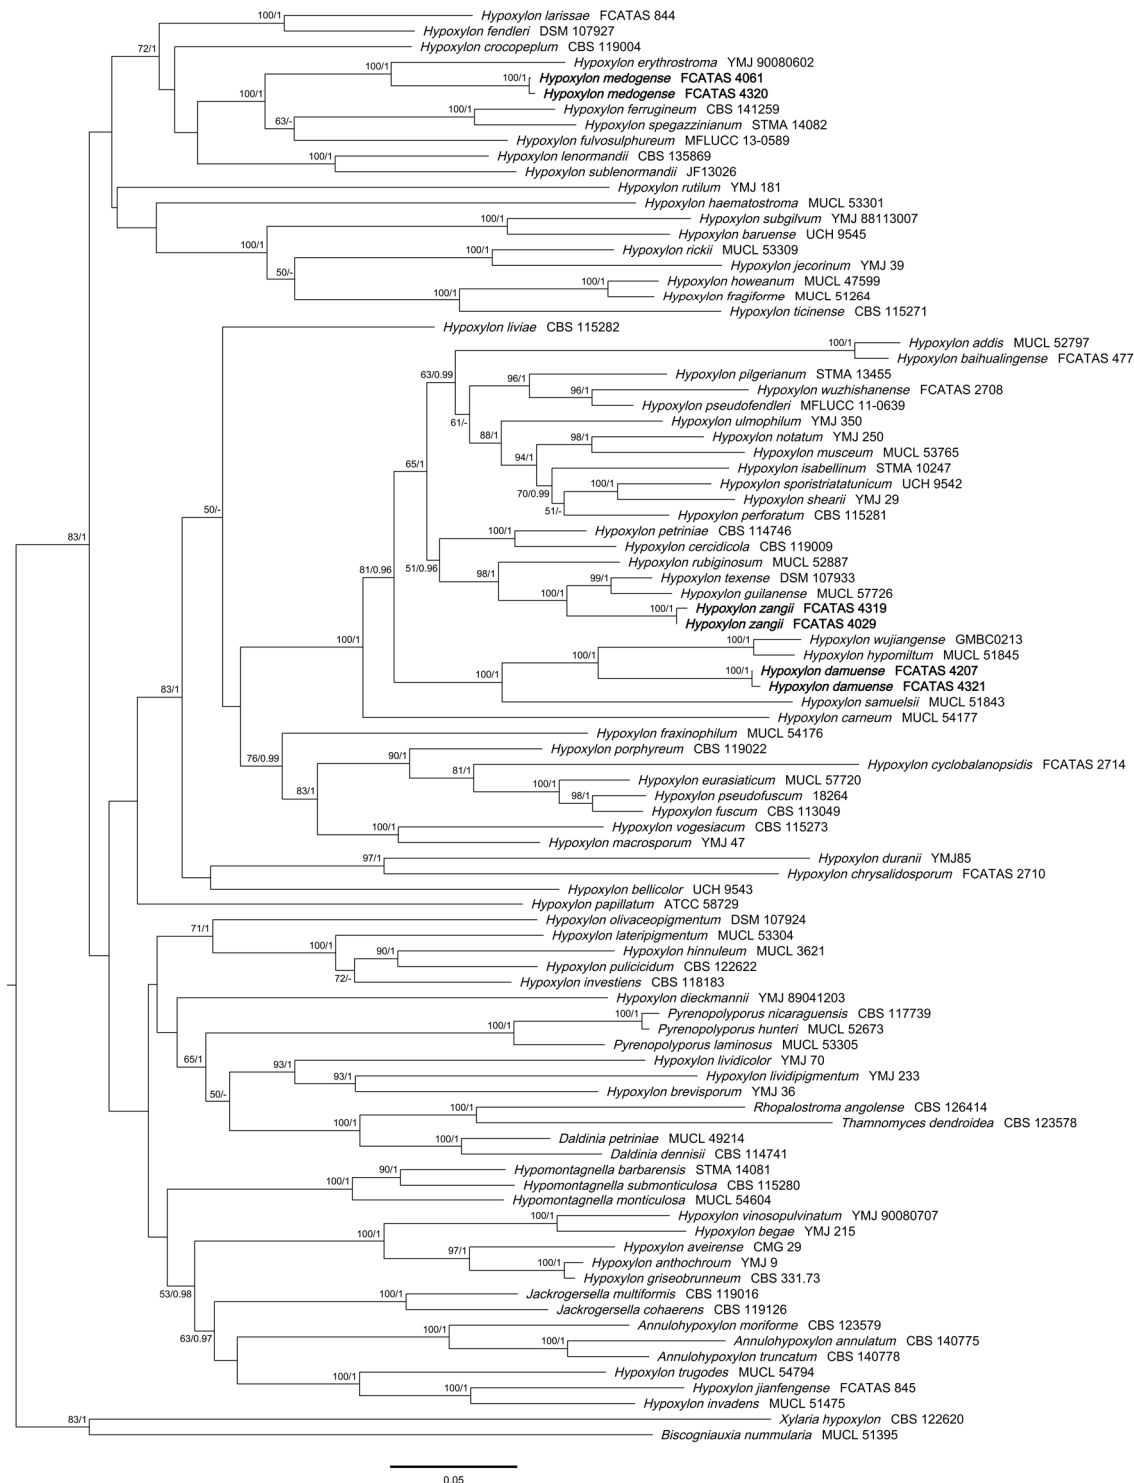

**Figure S1.** ML phylogram inferred from ITS-TUB2 sequences. ML bootstrap support (BS)  $\geq 50\%$  and Bayesian posterior probabilities (PP)  $\geq 0.95$  are labelled above or below the respective branches (BS/PP). Species in bold were sequenced in the this study.
